# Supplementary material for: COVID-19 mortality in cancer patients: a report from a tertiary cancer centre in India
Source: PeerJ. 2021 Jan 21;9:e10599. doi: 10.7717/peerj.10599 (PMC7827973; doi:10.7717/peerj.10599)
Supplement: Supplemental Information 1 [file peerj-09-10599-s001.xlsx]

## Sheet: Sheet1
S.No.	Age	Gender	RT-PCR Result	Symptoms_Fever_Cough_Sputum_Fatigue_Nausea_Chest distress_myalgia (muscle pain)_head ache_ sore throat	Fever	Fatigue	Cough	Respiratory distress	Pneumonia	Myalgia	Decrease in appetite	Head ache	Vomiting	Diarrhea	Category_Mild_Mod_Severe	Solid_1_Haematological_2	Brain_1_HN_2_Breast_3_Lung_4_MSK_5_GI_6_GU_7_Haem_8	Brain (1_Yes_0_No)	HN(1_yes_0_No)	Breast(1_yes_0_no)	Lung(1_yes_0_no)	MSK(1_yes_0_no)	GI(1_yes_0_no)	GU(1_yes_0_no)	Haem(1_yes_0_no)	Local_1_Advanced_2_Metastatic_3	Cardiovascular disease	COPD	Diabetes	HTN	Thyroid	Others	Comorbidity_None_0_Single_1_More_2	CT_Yes_1_No_0	RT_Yes_1_No_0	S_Yes_1_No_0	TT_Yes_1_No_0	IT_Yes_1_No_0	Treatment	T_Yes_1_no_0	V_Yes_1_No_0	Ventilator	Period (days)	Alive_0_Dead_1	Cause
1	52	M	Positive	Fever	1	0	0	0	0	0	0	0	0	0	Mild	1	7	0	0	0	0	0	0	1	0	3	0	0	0	0	0	0	0	0	0	0	1	0	TKI	1	0	No	.	0
2	72	M	Positive	Breathlessness,Weakness	0	1	0	1	0	0	0	0	0	0	Mod	1	4	0	0	0	1	0	0	0	0	2	1	1	0	0	0	0	2	1	0	0	0	0	CT	1	0	No	.	0
3	15	M	Positive	Respiratory Failure,Pneumonia	0	0	0	1	1	0	0	0	0	0	Severe	2	8	0	0	0	0	0	0	0	1	2	0	0	0	0	0	0	0	1	0	0	0	0	CT	1	1	Yes	2	1	Respiratory failure, COVID pneumonitis
4	35	M	Positive	Fever	1	0	0	0	0	0	0	0	0	0	Mild	1	1	1	0	0	0	0	0	0	0	2	0	0	0	0	0	0	0	0	0	0	0	0	.	0	0	No	.	0
5	45	M	Positive	Fever	1	0	0	0	0	0	0	0	0	0	Mild	2	8	0	0	0	0	0	0	0	1	2	0	0	0	0	0	0	0	0	0	0	0	0	.	0	0	No	.	0
6	53	F	Positive	Fever,Body pain	1	0	0	0	0	1	0	0	0	0	Mild	2	8	0	0	0	0	0	0	0	1	2	0	0	0	0	1	0	1	1	0	0	0	1	CT+IT	1	0	No	.	0
7	74	M	Positive	Fever	1	0	0	0	0	0	0	0	0	0	Mild	1	6	0	0	0	0	0	1	0	0	1	0	0	1	1	0	0	2	0	0	0	0	0	.	0	0	No	.	0
8	54	F	Positive	Fever	1	0	0	0	0	0	0	0	0	0	Mod	1	7	0	0	0	0	0	0	1	0	2	0	0	1	0	0	0	1	0	1	0	0	0	RT	1	0	No	.	0
9	58	M	Positive	Fever,cough	1	0	1	0	0	0	0	0	0	0	Mild	1	6	0	0	0	0	0	1	0	0	3	1	0	0	1	0	0	2	1	0	0	0	0	CT	1	0	No	.	0
10	54	M	Positive	Fever	1	0	0	0	0	0	0	0	0	0	Mild	1	2	0	1	0	0	0	0	0	0	1	1	0	1	1	0	0	2	0	0	0	0	0	.	0	0	No	.	0
11	54	M	Positive	Fever	1	0	0	0	0	0	0	0	0	0	Mod	1	4	0	0	0	1	0	0	0	0	3	0	0	0	0	0	0	0	1	0	0	0	0	CT	1	0	No	.	0
12	72	M	Positive	Pneumonia	0	0	0	0	1	0	0	0	0	0	Mod	2	8	0	0	0	0	0	0	0	1	2	0	0	0	0	0	0	0	1	0	0	0	0	CT	1	0	No	.	0
13	53	M	Positive	Fever,Myalgia	1	0	0	0	0	1	0	0	0	0	Mild	1	2	0	1	0	0	0	0	0	0	1	0	0	0	0	0	0	0	0	0	0	0	0	.	0	0	No	.	0
14	70	F	Positive	Fever	1	0	0	0	0	0	0	0	0	0	Mild	1	6	0	0	0	0	0	1	0	0	3	0	0	1	1	0	0	2	1	0	0	0	0	CT	1	0	No	.	0
15	51	M	Positive	Fever	1	0	0	0	0	0	0	0	0	0	Mild	1	6	0	0	0	0	0	1	0	0	1	0	0	1	1	0	0	2	1	0	0	0	0	CT	1	0	No	.	1
16	69	M	Positive	Respiratory Failure	0	0	0	1	0	0	0	0	0	0	Severe	2	8	0	0	0	0	0	0	0	1	2	0	0	1	1	0	0	2	1	0	0	0	0	CT	1	1	Yes	2	1	COVID19 with respiratory failure
17	32	M	Positive	Fever	1	0	0	0	0	0	0	0	0	0	Mild	2	8	0	0	0	0	0	0	0	1	2	0	0	0	0	0	0	0	1	0	0	0	0	CT	1	0	No	.	0
18	49	M	Positive	Fever	1	0	0	0	0	0	0	0	0	0	Mod	2	8	0	0	0	0	0	0	0	1	2	0	0	1	0	0	0	1	1	0	0	0	0	CT	1	0	No	.	0
19	49	F	Positive	Fever,Cough	1	0	1	0	0	0	0	0	0	0	Mod	1	7	0	0	0	0	0	0	1	0	1	0	0	1	1	0	0	2	0	0	0	0	0	.	0	0	No	.	0
20	45	F	Positive	Fever	1	0	0	0	0	0	0	0	0	0	Mild	1	7	0	0	0	0	0	0	1	0	1	0	0	0	0	0	0	0	0	0	1	0	0	S	1	0	No	.	0
21	55	F	Positive	Weakness,Body pain,Decrease appetite	0	1	0	0	0	1	1	0	0	0	Mod	1	7	0	0	0	0	0	0	1	0	1	0	0	0	1	1	0	2	0	0	1	0	0	S	1	0	No	.	0
22	28	M	Positive	Fever	1	0	0	0	0	0	0	0	0	0	Mild	2	8	0	0	0	0	0	0	0	1	1	0	0	0	0	0	0	0	0	0	0	0	0	.	0	0	No	.	0
23	57	M	Positive	Fever	1	0	0	0	0	0	0	0	0	0	Mild	1	2	0	1	0	0	0	0	0	0	2	1	0	0	1	0	0	2	1	1	0	0	0	CT+RT	1	0	No	.	0
24	92	M	Positive	Fever	1	0	0	0	0	0	0	0	0	0	Mild	2	8	0	0	0	0	0	0	0	1	2	0	0	0	1	0	0	1	0	0	0	0	0	.	0	0	No	.	0
25	38	M	Positive	Fever	1	0	0	0	0	0	0	0	0	0	Mild	1	2	0	1	0	0	0	0	0	0	1	0	0	0	0	0	0	0	0	0	0	0	0	.	0	0	No	.	0
26	33	F	Positive	Fever	1	0	0	0	0	0	0	0	0	0	Mild	1	3	0	0	1	0	0	0	0	0	2	0	0	0	0	0	0	0	0	0	0	0	1	IT	1	0	No	.	0
27	48	F	Positive	Body pain	0	0	0	0	0	1	0	0	0	0	Mild	1	3	0	0	1	0	0	0	0	0	2	0	0	0	0	1	0	1	1	0	0	0	0	CT	1	0	No	.	0
28	58	M	Positive	Pneumonia	0	0	0	0	1	0	0	0	0	0	Severe	1	2	0	1	0	0	0	0	0	0	1	0	0	1	1	1	0	2	0	0	1	0	0	S	1	1	Yes	10	1
29	50	M	Positive	Fever	1	0	0	0	0	0	0	0	0	0	Mild	1	2	0	1	0	0	0	0	0	0	1	0	0	0	0	0	0	0	0	0	0	0	0	.	0	0	No	.	0
30	52	F	Positive	Head ache	0	0	0	0	0	0	0	1	0	0	Mild	1	6	0	0	0	0	0	1	0	0	1	0	0	0	0	1	0	1	0	0	0	0	0	.	0	0	No	.	0
31	64	M	Positive	Fever	1	0	0	0	0	0	0	0	0	0	Mod	2	8	0	0	0	0	0	0	0	1	2	0	0	1	1	0	0	2	1	0	0	0	0	CT	1	0	No	.	0
32	19	F	Positive	Fever	1	0	0	0	0	0	0	0	0	0	Mild	2	8	0	0	0	0	0	0	0	1	2	0	0	0	0	0	0	0	1	0	0	0	0	CT	1	0	No	.	0
33	68	F	Positive	Respiratory Failure	0	0	0	1	0	0	0	0	0	0	Severe	1	7	0	0	0	0	0	0	1	0	1	0	0	1	0	0	0	1	0	0	1	0	0	S	1	0	No	.	1
34	40	M	Positive	Fever,Weakness,Shortness of breath	1	1	0	1	0	0	0	0	0	0	Mod	1	4	0	0	0	1	0	0	0	0	3	1	0	0	0	1	0	2	1	0	0	0	0	CT	1	0	No	.	0
35	24	F	Positive	Breathlessness	0	0	0	1	0	0	0	0	0	0	Mod	1	6	0	0	0	0	0	1	0	0	3	1	0	0	0	0	0	2	1	0	0	0	0	CT	1	1	Yes	4	1
36	55	F	Positive	Fever	1	0	0	0	0	0	0	0	0	0	Mild	1	7	0	0	0	0	0	0	1	0	1	0	0	0	0	0	0	0	0	0	0	0	0	.	0	0	No	.	0
37	42	M	Positive	fever	1	0	0	0	0	0	0	0	0	0	Mild	2	8	0	0	0	0	0	0	0	1	2	0	0	0	0	0	0	0	0	0	0	0	1	IT	1	0	No	.	0
38	57	M	Positive	Fever	1	0	0	0	0	0	0	0	0	0	Mod	1	7	0	0	0	0	0	0	1	0	2	0	0	1	1	0	0	2	0	0	0	0	0	.	0	0	No	.	0
39	78	M	Positive	Body pain	0	0	0	0	0	1	0	0	0	0	Mild	1	6	0	0	0	0	0	1	0	0	3	0	0	1	1	0	0	2	0	0	0	0	0	.	0	0	No	.	0
40	46	M	Positive	Cough	0	0	1	0	0	0	0	0	0	0	Mild	1	2	0	1	0	0	0	0	0	0	3	0	0	0	0	0	0	0	1	0	0	0	0	CT	1	0	No	.	0
41	46	F	Positive	Respiratory distress	0	0	0	1	0	0	0	0	0	0	Mod	1	3	0	0	1	0	0	0	0	0	3	0	0	0	0	0	0	0	1	0	0	0	0	CT	1	0	No	.	0
42	77	M	Positive	Fever	1	0	0	0	0	0	0	0	0	0	Mild	1	7	0	0	0	0	0	0	1	0	1	0	0	0	1	0	0	1	0	0	1	0	0	S	1	0	No	.	0
43	64	F	Positive	Fever	1	0	0	0	0	0	0	0	0	0	Mild	1	7	0	0	0	0	0	0	1	0	2	0	0	0	0	0	0	0	0	0	1	0	0	S	1	0	No	.	0
44	87	M	Positive	Fever	1	0	0	0	0	0	0	0	0	0	Mild	2	8	0	0	0	0	0	0	0	1	2	0	0	0	1	0	0	1	1	0	0	0	0	CT	1	0	No	.	0
45	46	F	Positive	Fever	1	0	0	0	0	0	0	0	0	0	Mild	1	6	0	0	0	0	0	1	0	0	3	0	0	0	0	0	0	0	0	0	0	0	0	.	0	0	No	.	0
46	42	M	Positive	Fever	1	0	0	0	0	0	0	0	0	0	Mild	1	6	0	0	0	0	0	1	0	0	3	0	0	0	0	0	1	1	1	0	0	0	0	CT	1	0	No	.	1	Sepsis with septic shock and progression of disease
47	42	M	Positive	Cough	0	0	1	0	0	0	0	0	0	0	Mild	1	5	0	0	0	0	1	0	0	0	1	0	0	1	1	0	0	2	0	0	1	0	0	S	1	0	No	.	0
48	50	M	Positive	Fever	1	0	0	0	0	0	0	0	0	0	Mild	1	2	0	1	0	0	0	0	0	0	1	0	0	0	0	0	0	0	0	0	0	0	0	.	0	0	No	.	0
49	43	F	Positive	Fever	1	0	0	0	0	0	0	0	0	0	Mild	1	6	0	0	0	0	0	1	0	0	1	0	0	0	0	0	0	0	0	0	0	0	0	.	0	0	No	.	0
50	57	M	Positive	Breathlessness,Respiratory Failure	0	0	0	1	0	0	0	0	0	0	Mod	1	2	0	1	0	0	0	0	0	0	1	0	0	1	0	0	0	1	1	1	0	0	0	CT+RT	1	0	No	.	1
51	50	M	Positive	Head ache	0	0	0	0	0	0	0	1	0	0	Mild	1	1	1	0	0	0	0	0	0	0	2	0	0	0	0	0	0	0	0	1	0	0	0	RT	1	0	No	.	0
52	53	M	Positive	Fever	1	0	0	0	0	0	0	0	0	0	Mild	1	5	0	0	0	0	1	0	0	0	1	0	0	0	0	0	0	0	0	0	1	0	0	S	1	0	No	.	0
53	62	M	Positive	Fever	1	0	0	0	0	0	0	0	0	0	Mild	1	6	0	0	0	0	0	1	0	0	1	0	0	0	0	0	0	0	0	0	0	0	0	.	0	0	No	.	0
54	61	M	Positive	Fever	1	0	0	0	0	0	0	0	0	0	Mild	2	8	0	0	0	0	0	0	0	1	2	0	0	0	0	0	0	0	0	0	0	0	0	.	0	0	No	.	0
55	34	M	Positive	Fever	1	0	0	0	0	0	0	0	0	0	Mild	2	8	0	0	0	0	0	0	0	1	1	0	0	0	0	0	0	0	1	0	0	0	1	CT+IT	1	0	No	.	0
56	42	F	Positive	Fever	1	0	0	0	0	0	0	0	0	0	Mild	1	3	0	0	1	0	0	0	0	0	1	0	0	0	0	0	0	0	0	0	0	0	0	.	0	0	No	.	0
57	58	F	Positive	Weakness	0	1	0	0	0	0	0	0	0	0	Mild	1	2	0	1	0	0	0	0	0	0	3	0	0	0	0	0	0	0	0	0	0	0	0	.	0	0	No	.	0
58	54	F	Positive	Breathlessness,Weakness	0	1	0	1	0	0	0	0	0	0	Mod	1	7	0	0	0	0	0	0	1	0	3	0	0	0	1	1	0	2	1	0	1	0	0	CT+S	1	0	No	.	0
59	57	M	Positive	Fever	1	0	0	0	0	0	0	0	0	0	Mild	1	2	0	1	0	0	0	0	0	0	3	0	0	0	0	0	0	0	0	0	0	0	0	.	0	0	No	.	0
60	54	M	Positive	Fever	1	0	0	0	0	0	0	0	0	0	Mild	1	2	0	1	0	0	0	0	0	0	3	0	0	0	0	0	0	0	0	0	0	0	0	.	0	0	No	.	0
61	59	M	Positive	Fever	1	0	0	0	0	0	0	0	0	0	Mild	1	7	0	0	0	0	0	0	1	0	3	0	0	0	0	0	0	0	0	0	1	0	0	S	1	0	No	.	0
62	3	F	Positive	Fever	1	0	0	0	0	0	0	0	0	0	Mild	1	7	0	0	0	0	0	0	1	0	1	0	0	0	0	0	0	0	1	0	0	0	0	CT	1	0	No	.	0
63	45	F	Positive	Yellowish Discoloration of eyes,Fever,Pain abdomen,Poor appetite	1	0	0	0	0	1	1	0	0	0	Mod	1	6	0	0	0	0	0	1	0	0	2	0	0	0	0	0	0	0	0	0	0	0	0	.	0	0	No	.	0
64	39	F	Positive	Respiratory Failure	0	0	0	1	0	0	0	0	0	0	Severe	1	3	0	0	1	0	0	0	0	0	2	0	0	0	0	1	0	1	0	0	1	0	0	S	1	0	No	.	0
65	58	M	Positive	Fever	1	0	0	0	0	0	0	0	0	0	Mild	1	6	0	0	0	0	0	1	0	0	2	0	0	0	0	0	0	0	0	0	0	0	0	.	0	0	No	.	0
66	22	M	Positive	Fever,Body pain	1	1	0	0	0	0	0	0	0	0	Mild	2	8	0	0	0	0	0	0	0	1	1	0	0	0	0	0	0	0	1	0	0	0	1	CT+IT	1	0	No	.	0
67	49	F	Positive	Fever	1	0	0	0	0	0	0	0	0	0	Mild	1	3	0	0	1	0	0	0	0	0	2	0	0	0	0	1	0	1	1	0	0	0	1	CT+IT	1	0	No	.	0
68	55	M	Positive	Fever	1	0	0	0	0	0	0	0	0	0	Mild	1	4	0	0	0	1	0	0	0	0	1	0	0	0	0	0	0	0	0	0	0	1	0	TKI	1	0	No	.	0
69	52	F	Positive	Body pain	0	1	0	0	0	0	0	0	0	0	Mild	1	3	0	0	1	0	0	0	0	0	1	0	0	0	0	0	0	0	0	0	0	0	0	.	0	0	No	.	0
70	24	M	Positive	Fever	1	0	0	0	0	0	0	0	0	0	Mild	1	7	0	0	0	0	0	0	1	0	1	0	0	0	0	0	0	0	0	0	1	0	0	S	1	0	No	.	0
71	45	M	Positive	Breathlessness	0	1	0	0	0	0	0	0	0	0	Mild	1	4	0	0	0	1	0	0	0	0	3	0	0	0	1	1	0	2	1	0	0	1	0	CT+TKI	1	0	No	.	0
72	52	M	Positive	Fever	1	0	0	0	0	0	0	0	0	0	Mild	1	5	0	0	0	0	1	0	0	0	3	0	0	1	0	1	0	2	0	0	0	1	0	TKI	1	0	No	.	1	Advanced disease, perforation, peritonitis, sepsis, MODS, COVID19
73	64	F	Positive	Respiratory Failure	0	0	0	1	0	0	0	0	0	0	Severe	1	6	0	0	0	0	0	1	0	0	1	1	0	0	0	0	0	1	0	0	0	0	0	.	0	1	Yes	6	1
74	49	M	Positive	Fever with chills	1	0	0	0	0	0	0	0	0	0	Mild	1	6	0	0	0	0	0	1	0	0	3	0	0	0	1	0	0	1	0	0	0	0	0	.	0	0	No	.	0
75	31	M	Positive	Fever	1	0	0	0	0	0	0	0	0	0	Mild	2	8	0	0	0	0	0	0	0	1	2	0	0	0	0	0	0	0	0	0	0	0	0	.	0	0	No	.	0
76	43	M	Positive	Fever	1	0	0	0	0	0	0	0	0	0	Mild	1	2	0	1	0	0	0	0	0	0	1	0	0	0	0	0	0	0	0	0	1	0	0	S	1	0	No	.	0
77	23	F	Positive	Body pain	0	0	0	0	0	1	0	0	0	0	Mild	1	2	0	1	0	0	0	0	0	0	2	0	0	0	0	0	0	0	0	1	0	0	0	RT	1	0	No	.	0
78	45	F	Positive	Weakness,Shortness of breath,Fever	0	1	0	1	0	0	0	0	0	0	Mod	1	7	0	0	0	0	0	0	1	0	1	0	0	0	0	0	0	0	0	0	0	0	0	.	0	0	No	.	0
79	37	F	Positive	Fever	1	0	0	0	0	0	0	0	0	0	Mild	1	3	0	0	1	0	0	0	0	0	1	0	0	0	0	1	0	1	0	0	0	0	0	.	0	0	No	.	0
80	69	F	Positive	Fever	1	0	0	0	0	0	0	0	0	0	Mild	1	3	0	0	1	0	0	0	0	0	1	0	0	0	0	0	0	0	0	0	1	0	0	S	1	0	No	.	0
81	57	F	Positive	Fever	1	0	0	0	0	0	0	0	0	0	Mild	1	3	0	0	1	0	0	0	0	0	1	0	0	0	0	1	0	1	0	0	1	0	0	S	1	0	No	.	0
82	75	M	Positive	Head ache	0	0	0	0	0	0	0	1	0	0	Mild	1	6	0	0	0	0	0	1	0	0	1	0	0	0	0	0	0	0	0	0	0	0	0	.	0	0	No	.	0
83	80	M	Positive	Fever	1	0	0	0	0	0	0	0	0	0	Mild	1	6	0	0	0	0	0	1	0	0	1	0	0	0	1	0	0	1	0	0	0	0	0	.	0	0	No	.	0
84	57	F	Positive	Breathlessness,Cough	0	0	1	1	0	0	0	0	0	0	Mod	1	3	0	0	1	0	0	0	0	0	3	0	0	0	1	1	0	2	1	0	0	0	0	CT	1	0	No	.	0
85	57	M	Positive	Body pain	0	0	0	0	0	1	0	0	0	0	Mild	1	2	0	1	0	0	0	0	0	0	2	0	0	0	0	0	0	0	0	0	0	0	0	.	0	0	No	.	0
86	55	F	Positive	Cough,Expectoration	0	0	1	0	0	0	0	0	0	0	Mild	2	8	0	0	0	0	0	0	0	1	2	0	0	0	0	0	0	0	0	0	0	0	0	.	0	0	No	.	0
87	57	F	Positive	Cough,Expectoration	0	0	1	0	0	0	0	0	0	0	Mod	1	6	0	0	0	0	0	1	0	0	2	0	0	0	0	0	0	0	0	0	0	0	0	.	0	0	No	.	1	Lung pneumonia
88	39	M	Positive	Fever	0	0	1	0	0	0	0	0	0	0	Mild	1	2	0	1	0	0	0	0	0	0	2	0	0	0	0	0	0	0	0	0	1	0	0	S	1	0	No	.	0
89	52	M	Positive	Fever,Body pain	1	0	0	0	0	1	0	0	0	0	Mild	1	2	0	1	0	0	0	0	0	0	2	0	0	0	0	0	0	0	1	1	0	0	0	CT+RT	1	0	No	.	0
90	24	F	Positive	Fever	1	0	0	0	0	0	0	0	0	0	Mild	1	6	0	0	0	0	0	1	0	0	2	0	0	0	0	0	0	0	1	1	0	0	0	CT+RT	1	0	No	.	0
91	56	F	Positive	Fever	1	0	0	0	0	0	0	0	0	0	Mild	1	7	0	0	0	0	0	0	1	0	2	0	0	0	0	1	0	1	1	0	0	0	1	CT+IT	1	0	No	.	0
92	63	F	Positive	Fever	1	0	0	0	0	0	0	0	0	0	Mild	1	6	0	0	0	0	0	1	0	0	2	0	0	0	1	0	0	1	1	1	0	0	0	CT+RT	1	0	No	.	0
93	38	F	Positive	Fever	1	0	0	0	0	0	0	0	0	0	Mild	1	2	0	1	0	0	0	0	0	0	3	0	0	0	0	0	0	0	1	1	0	0	0	CT+RT	1	0	No	.	0
94	59	M	Positive	Body pain	0	0	0	0	0	1	0	0	0	0	Mild	1	4	0	0	0	1	0	0	0	0	2	0	0	0	0	0	0	0	1	0	0	0	0	CT	1	0	No	.	0
95	52	M	Positive	Fever	1	0	0	0	0	0	0	0	0	0	Mild	1	2	0	1	0	0	0	0	0	0	2	0	0	1	0	0	0	1	0	0	0	0	0	.	0	0	No	.	0
96	41	F	Positive	Fever	1	0	0	0	0	0	0	0	0	0	Mild	1	6	0	0	0	0	0	1	0	0	3	0	0	1	0	0	0	1	1	0	0	0	0	CT	1	0	No	.	0
97	38	M	Positive	Fever	1	0	0	0	0	0	0	0	0	0	Mild	1	2	0	1	0	0	0	0	0	0	2	0	0	0	0	0	0	0	0	0	0	0	0	.	0	0	No	.	0
98	51	F	Positive	Head ache	0	0	0	0	0	0	0	1	0	0	Mild	1	2	0	1	0	0	0	0	0	0	3	0	0	0	0	1	0	1	0	1	0	0	0	RT	1	0	No	.	0
99	45	F	Positive	Fever	1	0	0	0	0	0	0	0	0	0	Mild	1	6	0	0	0	0	0	1	0	0	2	0	0	0	0	0	0	0	0	0	0	0	0	.	0	0	No	.	0
100	29	F	Positive	Fever	1	0	0	0	0	0	0	0	0	0	Mild	1	2	0	1	0	0	0	0	0	0	3	0	0	0	0	0	0	0	0	0	0	0	0	.	0	0	No	.	0
101	57	F	Positive	Fever	1	0	0	0	0	0	0	0	0	0	Mild	1	7	0	0	0	0	0	0	1	0	1	0	0	0	1	0	0	1	0	0	1	0	0	S	1	0	No	.	0
102	31	M	Positive	Fever	1	0	0	0	0	0	0	0	0	0	Mild	1	4	0	0	0	1	0	0	0	0	3	0	0	0	0	0	0	0	0	1	0	0	0	RT	1	0	No	.	0
103	37	F	Positive	Fever	1	0	0	0	0	0	0	0	0	0	Mild	1	3	0	0	1	0	0	0	0	0	2	0	0	0	0	0	0	0	0	1	0	0	0	RT	1	0	No	.	0
104	55	F	Positive	Fever	1	0	0	0	0	0	0	0	0	0	Mild	1	7	0	0	0	0	0	0	1	0	1	0	0	0	0	0	0	0	0	0	0	0	0	.	0	0	No	.	0
105	74	M	Positive	Body pain,Shortness of breath	0	0	0	1	0	1	0	0	0	0	Mod	1	4	0	0	0	1	0	0	0	0	3	0	1	0	0	0	0	2	0	1	0	0	0	RT	1	0	No	.	0
106	57	M	Positive	Fever	1	0	0	0	0	0	0	0	0	0	Mild	1	4	0	0	0	1	0	0	0	0	3	0	0	0	1	1	0	2	0	0	0	0	0	.	0	0	No	.	0
107	46	M	Positive	Head ache	0	0	0	0	0	0	0	1	0	0	Mild	1	4	0	0	0	1	0	0	0	0	3	0	0	0	0	0	0	0	0	0	1	0	0	S	1	0	No	.	0
108	32	F	Positive	Fever	1	0	0	0	0	0	0	0	0	0	Mild	1	7	0	0	0	0	0	0	1	0	2	0	0	0	0	1	0	1	1	1	0	0	0	CT+RT	1	0	No	.	0
109	65	M	Positive	Cough	0	0	1	0	0	0	0	0	0	0	Mild	1	2	0	1	0	0	0	0	0	0	2	0	0	0	1	0	0	1	0	0	0	0	0	.	0	0	No	.	0
110	59	F	Positive	Fever	1	0	0	0	0	0	0	0	0	0	Mild	1	3	0	0	1	0	0	0	0	0	2	0	0	0	0	0	0	0	0	0	1	0	0	S	1	0	No	.	0
111	46	M	Positive	Fever	1	0	0	0	0	0	0	0	0	0	Mild	1	2	0	1	0	0	0	0	0	0	2	0	0	0	0	0	0	0	0	0	1	0	0	S	1	0	No	.	0
112	22	F	Positive	Vomiting	0	0	0	0	0	0	0	0	1	0	Mod	1	6	0	0	0	0	0	1	0	0	3	0	0	0	0	0	0	0	1	0	0	0	1	CT+IT	1	0	No	.	0
113	45	M	Positive	Fever	1	0	0	0	0	0	0	0	0	0	Mild	1	6	0	0	0	0	0	1	0	0	1	0	0	0	0	0	1	1	0	0	0	0	0	.	0	0	No	.	0
114	53	F	Positive	Fever	1	0	0	0	0	0	0	0	0	0	Mild	2	8	0	0	0	0	0	0	0	1	2	0	0	1	1	0	0	2	1	0	0	0	0	CT	1	0	No	.	1
115	48	F	Positive	Fever,Pnemonia	1	0	0	0	1	0	0	0	0	0	Mod	1	7	0	0	0	0	0	0	1	0	1	0	0	0	1	0	0	1	1	0	0	0	0	CT	1	0	No	.	0
116	74	F	Positive	Fever	1	0	0	0	0	0	0	0	0	0	Mod	1	7	0	0	0	0	0	0	1	0	2	0	0	0	1	1	0	2	1	0	0	0	0	CT	1	0	No	.	0
117	70	F	Positive	Fever	1	0	0	0	0	0	0	0	0	0	Mild	1	6	0	0	0	0	0	1	0	0	2	0	0	1	1	0	0	2	0	0	0	0	0	.	0	0	No	.	0
118	54	F	Positive	Fever	1	0	0	0	0	0	0	0	0	0	Mild	1	7	0	0	0	0	0	0	1	0	3	1	0	1	0	1	0	2	1	0	1	0	0	CT+S	1	0	No	.	0
119	45	M	Positive	Cough,Expectoration,Shortness of Breath	0	0	1	1	0	0	0	0	0	0	Mod	1	4	0	0	0	1	0	0	0	0	3	0	0	0	0	0	0	0	1	0	0	0	0	CT	1	0	No	.	0
120	56	F	Positive	Shortness of Breath	0	0	0	1	0	0	0	0	0	0	Mod	1	7	0	0	0	0	0	0	1	0	2	1	0	1	1	1	0	2	1	0	0	0	0	CT	1	0	No	.	0
121	56	F	Positive	Fever	1	0	0	0	0	0	0	0	0	0	Mild	1	7	0	0	0	0	0	0	1	0	1	0	0	0	1	0	0	1	0	0	1	0	0	S	1	0	No	.	0
122	69	M	Positive	Fever	1	0	0	0	0	0	0	0	0	0	Mild	1	2	0	1	0	0	0	0	0	0	2	0	0	1	0	0	0	1	0	0	0	0	0	.	0	0	No	.	0
123	48	F	Positive	Shortness of Breath	0	0	0	1	0	0	0	0	0	0	Mod	1	6	0	0	0	0	0	1	0	0	3	0	0	0	0	1	0	1	0	1	0	0	0	RT	1	0	No	.	0
124	60	F	Positive	Difficulty in swallowing for solids	0	0	0	0	0	0	1	0	0	0	Mild	1	6	0	0	0	0	0	1	0	0	3	0	0	0	0	1	0	1	1	1	0	0	0	CT+RT	1	0	No	.	0
125	55	F	Positive	Fever	1	0	0	0	0	0	0	0	0	0	Mild	1	3	0	0	1	0	0	0	0	0	2	0	0	0	1	0	0	1	0	0	1	0	0	S	1	0	No	.	0
126	18	M	Positive	Fever,Tachypnea	1	0	0	1	0	0	0	0	0	0	Mod	2	8	0	0	0	0	0	0	0	1	2	0	0	0	0	0	0	0	1	0	0	0	0	CT	1	0	No	.	0
127	56	F	Positive	Fever	1	0	0	0	0	0	0	0	0	0	Mild	1	7	0	0	0	0	0	0	1	0	1	0	0	1	1	0	0	2	0	0	0	0	0	.	0	0	No	.	0
128	61	M	Positive	Fever	1	0	0	0	0	0	0	0	0	0	Mild	1	4	0	0	0	1	0	0	0	0	1	0	0	0	0	0	0	0	0	0	0	0	0	.	0	0	No	.	0
129	56	M	Positive	Body pain	0	0	0	0	0	1	0	0	0	0	Mild	1	6	0	0	0	0	0	1	0	0	2	0	0	0	0	1	0	1	1	0	0	0	0	CT	1	0	No	.	0
130	66	F	Positive	Fever	1	0	0	0	0	0	0	0	0	0	Mild	1	7	0	0	0	0	0	0	1	0	1	0	0	0	0	1	0	1	1	0	0	0	0	CT	1	0	No	.	0
131	50	F	Positive	Fever	1	0	0	0	0	0	0	0	0	0	Mild	2	8	0	0	0	0	0	0	0	1	3	0	0	0	1	0	0	1	1	0	0	0	1	CT+IT	1	0	No	.	0
132	75	M	Positive	Fever	1	0	0	0	0	0	0	0	0	0	Mild	1	4	0	0	0	1	0	0	0	0	1	0	0	0	0	0	0	0	0	0	1	0	0	S	1	0	No	.	0
133	61	M	Positive	Fever,Weakness	1	1	0	0	0	0	0	0	0	0	Mod	1	4	0	0	0	1	0	0	0	0	3	0	0	1	0	0	0	1	1	1	0	0	0	CT+RT	1	0	No	.	0
134	21	M	Positive	Fever with chills	1	0	0	0	0	0	0	0	0	0	Mod	2	8	0	0	0	0	0	0	0	1	2	0	0	0	0	0	0	0	1	0	0	0	0	CT	1	0	No	.	0
135	20	M	Positive	Fatigue,Cough	0	1	1	0	0	0	0	0	0	0	Mod	2	8	0	0	0	0	0	0	0	1	2	0	0	0	0	0	0	0	0	0	0	0	0	.	0	0	No	.	1
136	28	F	Positive	Fever	1	0	0	0	0	0	0	0	0	0	Mild	1	3	0	0	1	0	0	0	0	0	1	0	0	0	0	0	0	0	0	0	0	0	0	.	0	0	No	.	0
137	49	M	Positive	Fever	1	0	0	0	0	0	0	0	0	0	Mild	1	6	0	0	0	0	0	1	0	0	1	0	0	1	0	0	0	1	1	1	0	0	0	CT+RT	1	0	No	.	0
138	11	M	Positive	Fever	1	0	0	0	0	0	0	0	0	0	Mod	2	8	0	0	0	0	0	0	0	1	2	0	0	0	0	0	0	0	1	0	0	0	0	CT	1	0	No	.	0
139	44	F	Positive	Fever,Vomiting,Body pain,Weakness	1	1	0	0	0	1	0	0	1	0	Mod	1	6	0	0	0	0	0	1	0	0	3	0	0	0	0	0	0	0	1	0	0	0	0	CT	1	0	No	.	1
140	29	F	Positive	Fever	1	0	0	0	0	0	0	0	0	0	Mild	1	3	0	0	1	0	0	0	0	0	1	0	0	0	0	0	0	0	1	0	0	0	0	CT	1	0	No	.	0
141	55	F	Positive	Head ache	0	0	0	0	0	0	0	1	0	0	Mild	1	7	0	0	0	0	0	0	1	0	2	0	0	0	0	0	0	0	0	0	1	0	0	S	1	0	No	.	0
142	71	M	Positive	Weakness	0	1	0	0	0	0	0	0	0	0	Mild	1	4	0	0	0	1	0	0	0	0	1	0	0	1	0	0	1	2	1	0	1	0	0	CT+S	1	0	No	.	0
143	46	M	Positive	Fever,Diarrhea	1	0	0	0	0	0	0	0	0	1	Mod	1	2	0	1	0	0	0	0	0	0	2	0	0	0	0	0	0	0	0	0	1	0	0	S	1	0	No	.	0
144	48	F	Positive	Weakness	0	1	0	0	0	0	0	0	0	0	Mild	1	3	0	0	1	0	0	0	0	0	1	0	0	0	1	0	0	1	0	0	1	0	0	S	1	0	No	.	0
145	13	M	Positive	Fever,Cough,Head ache,Myalgia	1	0	1	0	0	1	0	1	0	0	Mod	1	5	0	0	0	0	1	0	0	0	3	0	0	0	0	0	0	0	1	0	0	0	0	CT	1	0	No	.	1
146	33	M	Positive	Pneumonia	0	0	0	0	1	0	0	0	0	0	Severe	2	8	0	0	0	0	0	0	0	1	1	0	0	0	0	0	0	0	1	0	0	0	1	CT+IT	1	0	No	.	0
147	17	M	Positive	Fever,Headache,Vomiting	1	0	0	0	0	0	0	1	1	0	Mod	2	8	0	0	0	0	0	0	0	1	2	0	0	0	0	0	0	0	1	0	0	0	0	CT	1	0	No	.	0
148	55	F	Positive	Fever	1	0	0	0	0	0	0	0	0	0	Mild	1	4	0	0	0	1	0	0	0	0	3	0	0	0	1	1	0	2	0	0	0	0	0	.	0	0	No	.	0
149	13	M	Positive	Fever	1	0	0	0	0	0	0	0	0	0	Mod	1	5	0	0	0	0	1	0	0	0	3	0	0	0	0	0	0	0	1	0	0	0	0	CT	1	0	No	.	0
150	30	M	Positive	Fever,Weakness,Head ache	1	1	0	0	0	0	0	1	0	0	Mod	2	8	0	0	0	0	0	0	0	1	2	0	0	0	0	0	0	0	1	0	0	0	0	CT	1	0	No	.	0
151	46	M	Positive	Fever	1	0	0	0	0	0	0	0	0	0	Mild	1	7	0	0	0	0	0	0	1	0	1	0	0	0	0	0	0	0	0	0	0	0	0	.	0	0	No	.	0
152	68	F	Positive	Fever,Weakness	1	1	0	0	0	0	0	0	0	0	Mild	1	7	0	0	0	0	0	0	1	0	3	0	0	0	0	0	0	0	0	0	0	0	0	.	0	0	No	.	0
153	52	F	Positive	Weakness	0	1	0	0	0	0	0	0	0	0	Mild	1	7	0	0	0	0	0	0	1	0	2	0	0	0	0	0	0	0	1	1	0	0	0	CT+RT	1	0	No	.	0
154	40	M	Positive	Fever	1	0	0	0	0	0	0	0	0	0	Mild	1	2	0	1	0	0	0	0	0	0	2	0	0	0	0	0	0	0	0	0	1	0	0	S	1	0	No	.	0
155	79	M	Positive	Fever	1	0	0	0	0	0	0	0	0	0	Mild	1	7	0	0	0	0	0	0	1	0	2	0	0	1	0	0	0	1	0	0	0	0	0	.	0	0	No	.	0
156	58	M	Positive	Cough	0	0	1	0	0	0	0	0	0	0	Mild	1	6	0	0	0	0	0	1	0	0	3	0	0	0	1	0	0	1	0	0	0	0	0	.	0	0	No	.	0
157	65	M	Positive	Fever	1	0	0	0	0	0	0	0	0	0	Mild	1	6	0	0	0	0	0	1	0	0	2	0	0	0	0	0	0	0	0	0	0	0	0	.	0	0	No	.	0
158	55	M	Positive	Vomiting	0	0	0	0	0	0	0	0	1	0	Mod	1	6	0	0	0	0	0	1	0	0	1	0	0	0	1	1	0	2	0	0	0	0	0	.	0	0	No	.	1
159	42	F	Positive	Fever,Breathlessness	1	0	0	1	0	0	0	0	0	0	Mod	1	3	0	0	1	0	0	0	0	0	3	0	0	0	1	0	0	1	0	0	0	1	0	TT	1	0	No	.	0
160	45	M	Positive	Fever	1	0	0	0	0	0	0	0	0	0	Mild	2	8	0	0	0	0	0	0	0	1	2	0	0	0	0	1	0	1	0	0	0	0	0	.	0	0	No	.	0
161	52	F	Positive	Fever	1	0	0	0	0	0	0	0	0	0	Mild	1	6	0	0	0	0	0	1	0	0	3	1	0	1	0	0	0	2	0	0	0	0	0	.	0	0	No	.	1
162	55	F	Positive	Shortness of Breath	0	0	0	1	0	0	0	0	0	0	Mod	1	3	0	0	1	0	0	0	0	0	3	0	0	0	0	0	0	0	1	0	0	0	1	CT+IT	1	1	Yes	2	1	Septic shock, COVID19 positive
163	62	M	Positive	Fever	1	0	0	0	0	0	0	0	0	0	Mild	1	7	0	0	0	0	0	0	1	0	2	0	0	0	0	1	0	1	0	0	0	0	0	.	0	1	Yes	2	1	COVID19, respiratory failure
164	44	F	Positive	Shortness of Breath	0	0	0	1	0	0	0	0	0	0	Mild	1	2	0	1	0	0	0	0	0	0	2	0	0	0	0	0	0	0	0	0	1	0	0	S	1	1	Yes	6	1
165	42	M	Positive	Shortness of Breath	0	0	0	1	0	0	0	0	0	0	Severe	1	2	0	1	0	0	0	0	0	0	3	0	0	0	0	0	1	2	1	0	0	0	0	CT	1	0	No	.	1
166	45	F	Positive	Breathlessness	0	0	0	1	0	0	0	0	0	0	Mod	1	2	0	1	0	0	0	0	0	0	3	0	0	1	1	0	0	2	1	0	0	0	0	CT	1	1	Yes	14	1
167	56	M	Positive	Weakness	0	1	0	0	0	0	0	0	0	0	Mild	2	8	0	0	0	0	0	0	0	1	2	0	0	0	1	0	0	1	0	0	0	0	0	.	0	1	Yes	5	1	Cardiac arrest with COVID19 positive pneumonia
168	69	M	Positive	Shortness of Breath	0	0	0	1	0	0	0	0	0	0	Severe	1	2	0	1	0	0	0	0	0	0	2	0	0	1	1	0	0	2	0	0	1	0	0	S	1	0	No	.	1	Advanced disease, Cardiac arrest, COVID19 positive
169	60	F	Positive	Fever	1	0	0	0	0	0	0	0	0	0	Mild	1	7	0	0	0	0	0	0	1	0	3	0	0	1	0	0	0	1	1	0	0	0	0	CT	1	0	No	.	0
170	57	M	Positive	Weakness	0	1	0	0	0	0	0	0	0	0	Mild	2	8	0	0	0	0	0	0	0	1	2	0	0	0	0	0	1	2	0	0	0	0	0	.	0	0	No	.	0
171	53	F	Positive	Weakness,Cough	0	1	1	0	0	0	0	0	0	0	Mild	1	6	0	0	0	0	0	1	0	0	2	0	0	0	0	0	0	0	0	0	0	0	0	.	0	0	No	.	0
172	59	F	Positive	Fever	1	0	0	0	0	0	0	0	0	0	Mild	1	7	0	0	0	0	0	0	1	0	3	0	0	1	1	1	0	2	1	1	0	0	0	CT+RT	1	0	No	.	0
173	66	F	Positive	Fever	1	0	0	0	0	0	0	0	0	0	Mild	1	7	0	0	0	0	0	0	1	0	1	0	0	0	0	0	0	0	0	1	0	0	0	RT	1	0	No	.	0
174	54	M	Positive	Fever	1	0	0	0	0	0	0	0	0	0	Mild	1	6	0	0	0	0	0	1	0	0	1	0	0	0	0	0	0	0	0	0	0	0	0	.	0	0	No	.	0
175	43	M	Positive	Fever,cough,Breathing difficulty	1	0	1	1	0	0	0	0	0	0	Mod	2	8	0	0	0	0	0	0	0	1	2	0	0	0	0	0	0	0	0	0	0	0	0	.	0	1	Yes	18	1
176	40	M	Positive	Weakness,Diarrhea	0	1	0	0	0	0	0	0	0	1	Mild	1	6	0	0	0	0	0	1	0	0	3	0	0	0	0	0	0	0	1	0	0	0	0	CT	1	0	No	.	0
177	74	F	Positive	Fever,Cough	1	0	1	0	0	0	0	0	0	0	Mod	1	6	0	0	0	0	0	1	0	0	3	0	0	0	0	0	0	0	1	0	0	1	0	CT+TKI	1	1	Yes	1	1	Advanced disease, COVID19 disease positive, Cardiac arrest
178	75	M	Positive	Weakness	0	1	0	0	0	0	0	0	0	0	Mild	2	8	0	0	0	0	0	0	0	1	2	1	0	0	1	0	0	2	0	0	0	0	0	.	0	0	No	.	1
179	22	M	Positive	Fever	1	0	0	0	0	0	0	0	0	0	Mild	1	5	0	0	0	0	1	0	0	0	2	0	0	0	0	0	0	0	0	0	0	0	0	.	0	0	No	.	0
180	34	M	Positive	Cough	0	0	1	0	0	0	0	0	0	0	Mild	1	2	0	1	0	0	0	0	0	0	2	0	0	0	0	0	0	0	0	0	0	0	0	.	0	0	No	.	0
181	78	F	Positive	Weakness,Body pain	0	1	0	0	0	1	0	0	0	0	Mild	1	6	0	0	0	0	0	1	0	0	2	0	0	0	0	0	0	0	0	0	0	0	0	.	0	0	No	.	0
182	53	M	Positive	Fever	1	0	0	0	0	0	0	0	0	0	Mild	1	4	0	0	0	1	0	0	0	0	2	0	0	0	0	0	0	0	0	0	0	0	0	.	0	0	No	.	0
183	35	M	Positive	Weakness,Fever,Fatigue	1	1	0	0	0	0	0	0	0	0	Mod	2	8	0	0	0	0	0	0	0	1	2	0	0	0	0	0	0	0	0	0	0	0	0	.	0	0	No	.	0
184	68	F	Positive	Weakness	0	1	0	0	0	0	0	0	0	0	Mild	1	7	0	0	0	0	0	0	1	0	1	0	0	0	0	0	0	0	0	0	0	0	0	.	0	0	No	.	0
185	67	M	Positive	Fever	1	0	0	0	0	0	0	0	0	0	Mild	1	6	0	0	0	0	0	1	0	0	1	0	0	0	0	0	0	0	0	0	0	0	0	.	0	0	No	.	0
186	64	M	Positive	Weakness	0	1	0	0	0	0	0	0	0	0	Mild	1	2	0	1	0	0	0	0	0	0	1	0	0	1	0	0	0	1	0	0	0	0	0	.	0	0	No	.	0
